# Supplementary material
Source: PubMed Central journal article supplement (PMC3076709)
Supplement: NIHMS281136-supplement-Supplementary_Data.pdf [file NIHMS281136-supplement-Supplementary_Data.pdf]

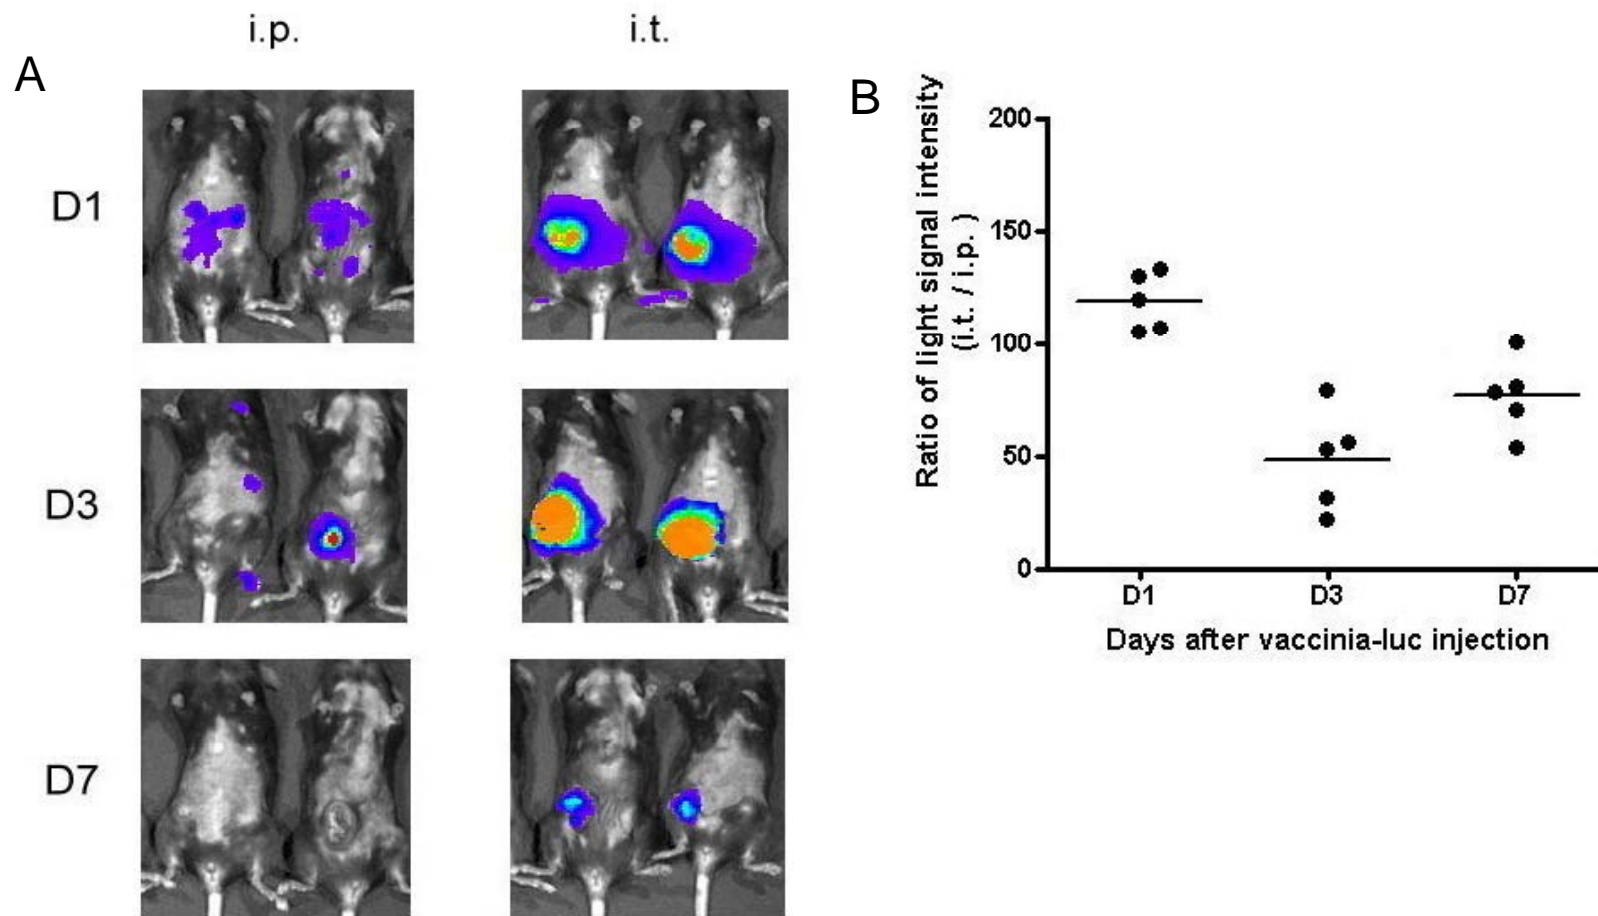

**Supplementary Figure 1. Luminescence imaging demonstrating vaccinia infection in mice.** Groups of C57BL/6 mice (5 per group) were subcutaneously challenged with  $5 \times 10^4$ /mouse of TC-1 tumor cells. When tumor size reached about 8~10 mm, mice were treated with either i.t. or i.p. injection of Vac-luc at  $1 \times 10^7$  pfu/mouse. **(A)** Representative bioluminescence signal for each group over time. **(B)** Bar graph depicting the ratios of signal intensity of i.t. over i.p. in mice treated with Vac-luc over time.

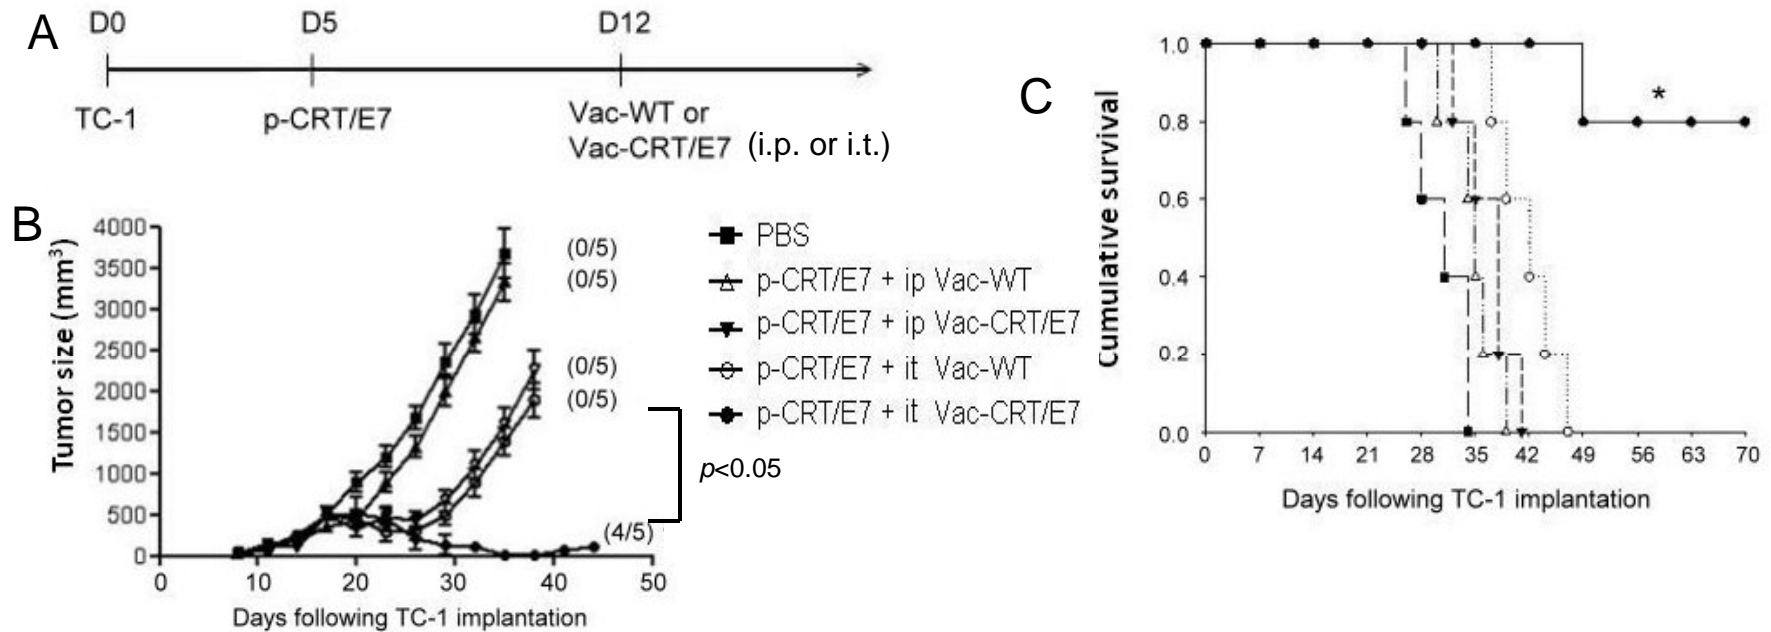

**Supplementary Figure 2. In vivo tumor treatment experiments.** Groups of C57BL/6 mice (5 per group) were subcutaneously challenged with  $5 \times 10^4$ /mouse of TC-1 tumor cells. 5 days after tumor challenge, mice were immunized with  $2 \mu\text{g}/\text{mouse}$  of pcDNA3 expressing CRT/E7 (p-CRT/E7) by gene gun. On day 12, mice were boosted by intraperitoneal or intratumoral injection of  $1 \times 10^7$  pfu/mouse of either wild-type vaccinia (Vac-WT) or vaccinia encoding CRT/E7 (Vac-CRT/E7). TC-1 tumor-bearing mice treated with 1X PBS were used as a control. **(A)** Diagrammatic representation of the prime-boost treatment regimen. **(B)** Line graph depicting the tumor volume in TC-1 tumor bearing mice treated with the different prime-boost regimens. Numbers in parentheses indicate complete tumor rejection rates. **(C)** Kaplan & Meier survival analysis of TC-1 tumor challenged mice treated with the different treatment regimens. \* indicates  $p < 0.05$ . Data shown are representative of two experiments performed (mean+SD).

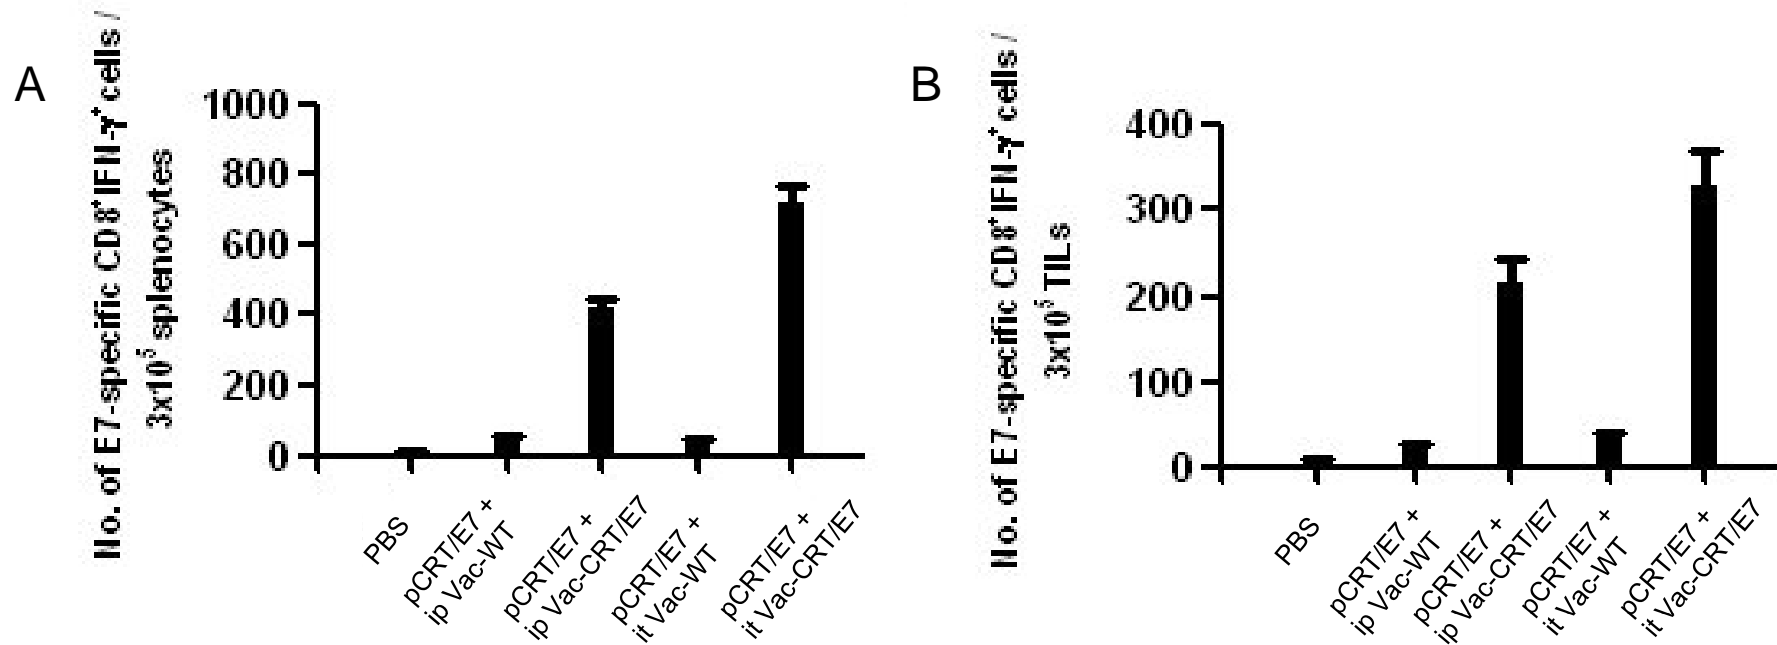

**Supplementary Figure 3. Intracellular cytokine staining followed by flow cytometry analysis to determine the number of E7-specific CD8<sup>+</sup> T cells in tumor-bearing mice treated with the different prime-boost regimens.**

Groups of C57BL/6 mice (5 per group) were subcutaneously challenged with  $5 \times 10^4$ /mouse of TC-1 tumor cells. 5 days after tumor challenge, mice were immunized with  $2 \mu\text{g}$ /mouse of pcDNA3 expressing CRT/E7 (p-CRT/E7) by gene gun. On day 12, mice were boosted by intraperitoneal or intratumoral injection of  $1 \times 10^7$  pfu/mouse of either wild-type vaccinia (Vac-WT) or vaccinia encoding CRT/E7 (Vac-CRT/E7). TC-1 tumor-bearing mice treated with PBS were used as a control. 7 days after vaccinia infection, cells from the spleens (**A**) and tumors (**B**) of mice were harvested and stained for CD8 and intracellular IFN- $\gamma$  and then characterized for E7-specific CD8<sup>+</sup> T cells using intracellular IFN- $\gamma$  staining followed by flow cytometry analysis. Bar graph depicting the numbers of OVA-specific IFN- $\gamma$ -secreting CD8<sup>+</sup> T cells per  $2 \times 10^5$  pooled cells in the (**A**) spleens and (**B**) tumors of treated mice. Data shown are representative of two experiments performed (mean+SD).

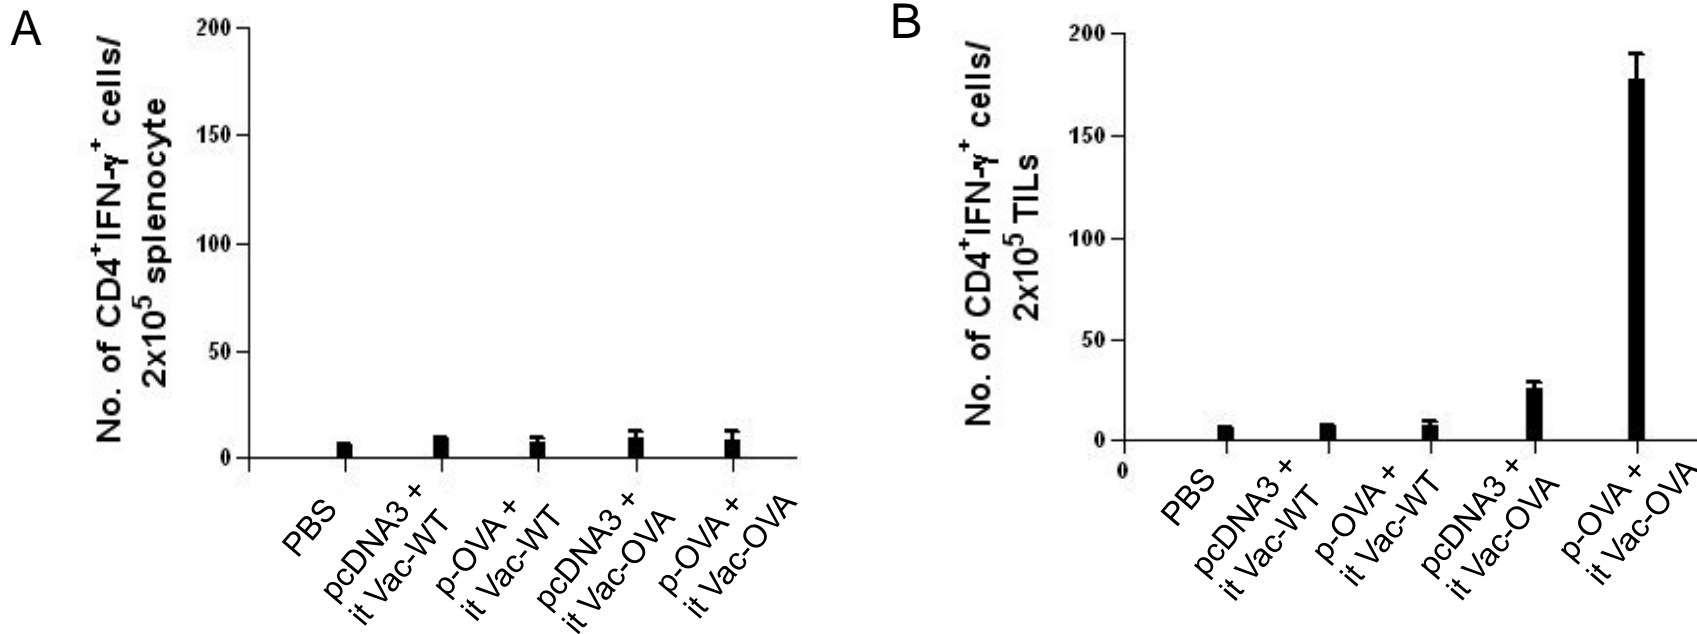

**Supplementary Figure 4. Intracellular cytokine staining followed by flow cytometry analysis to determine the number of OVA-specific CD4<sup>+</sup> T cells in tumor-bearing mice treated with the different prime-boost regimens.** Groups of C57BL/6 mice (5 per group) were challenged subcutaneously with  $5 \times 10^4$ /mouse of B16/F10 tumor cells. 5 days after tumor challenge, mice were immunized with either pcDNA3 or p-OVA DNA by gene gun and boosted by intratumoral injection of either Vac-WT or Vac-OVA as shown in **Figure 1**. TC-1 tumor-bearing mice treated with 1X PBS were used as a control. 7 days after vaccinia infection, cells from the spleens (**A**) and tumors (**B**) of mice were harvested and stained for CD8 and intracellular IFN- $\gamma$  and then characterized for OVA-specific CD4<sup>+</sup> T cells using intracellular IFN- $\gamma$  staining followed by flow cytometry analysis. Bar graph depicting the numbers of OVA-specific IFN- $\gamma$ -secreting CD4<sup>+</sup> T cells per  $2 \times 10^5$  pooled cells in the (**A**) spleens and (**B**) tumors of treated mice. Data shown are representative of two experiments performed (mean $\pm$ SD).

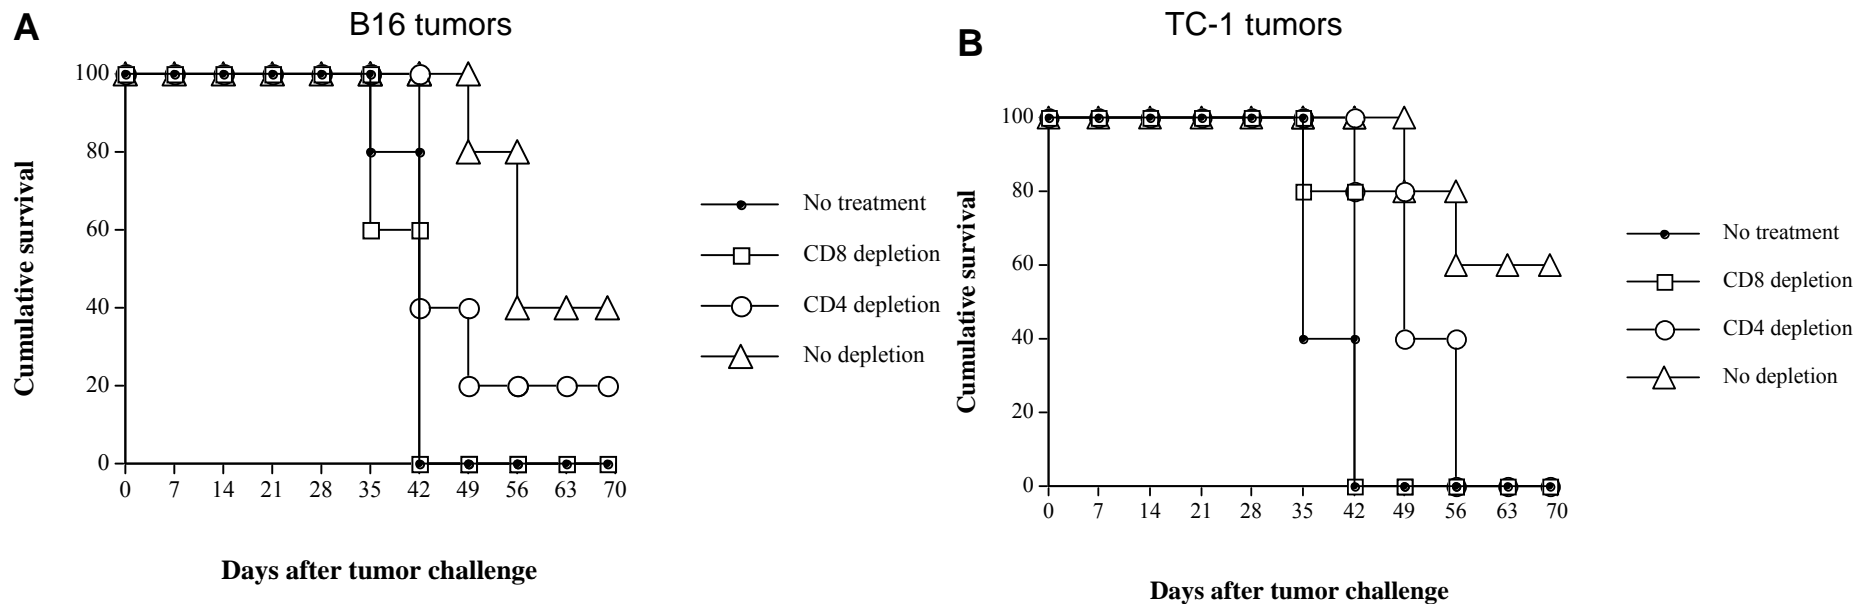

**Supplementary Figure 5. In vivo antibody depletion experiments.** C57BL/6 mice (5 per group) were subcutaneously challenged with  $5 \times 10^4$ /mouse of B16/F10 or TC-1 tumor cells. 5 days after tumor challenge, mice were immunized with  $2 \mu\text{g}$ /mouse of pcDNA3 expressing ovalbumin (p-OVA) by gene gun. On day 12, mice were boosted by intratumoral injection of  $1 \times 10^7$  pfu/mouse of vaccinia encoding ovalbumin (Vac-OVA). Mice were depleted of CD4 or CD8+ T cells using antibodies every alternate day starting from D5 for 3 doses followed by once a week till the end of the experiment. Tumor-bearing mice treated with 1X PBS were used as a control. Kaplan & Meier survival analysis of (A) B16 or (B) TC-1 tumor bearing mice treated with the different treatment regimens.
